# Supplementary material for: WO3 Photocatalyst Containing Copper Inactivates SARS-CoV-2 Pango Lineage A and Omicron BA.2 Variant in Visible Light and in Darkness
Source: MDPI journal article supplement (doi:10.3390/pathogens11080922), 2022-08-16
Supplement: s1 [file s1]

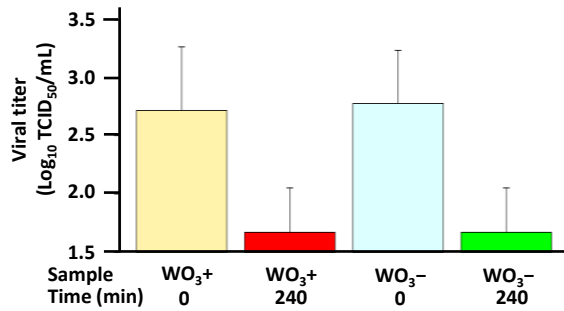

**Figure S1:** Antiviral effect of WO<sub>3</sub> photocatalyst with or without WO<sub>3</sub> for HCoV-229E. A wet filter paper was placed in a 10 cm dish to avoid dryness. Glass coated photocatalyst solution with or without WO<sub>3</sub> (100 mg) was placed on a plastic tube which was in turn placed on the filter paper to avoid direct contact with the filter paper. HCoV-229E (150  $\mu$ L) with a titer of  $1.47 \times 10^5$  50% tissue culture infective dose (TCID<sub>50</sub>)/mL was placed on the coated or uncoated glass. WO<sub>3</sub> photocatalyst was excited by white LED light with 1000 lx for 0 or 240 min. Titers of HCoV-229E strain were measured using the TCID<sub>50</sub> assay with MRC-5 cells. Assays were performed in at least 6 wells and the values represent the mean  $\pm$  standard deviation (SD) of three independent experiments.
